# Supplementary material for: Intestinal microbiome changes and mechanisms of maintenance hemodialysis patients with constipation
Source: Frontiers journal article supplement (doi:10.3389/fcimb.2024.1495364), 2024-11-11
Supplement: Data_Sheet_1.pdf [file Data_Sheet_1.pdf]

### 罗马 IV 便秘诊断问卷调查表

1. 最近 3 个月，在未使用通便药或灌肠剂的情况下，你每周排便次数为多少？
  - a.  $\geq 1$  次/天=0
  - b.  $\geq 3$  次/周=1
  - c.  $\leq 3$  次/周=2
2. 最近 3 个月，你排干硬便或干球便有多频繁？
  - a. 从不=0
  - b. 有问题 ( $\leq 50\%$ ) =1
  - c. 严重问题 ( $\geq 50\%$ ) =2
3. 最近 3 个月，你是否感到排便费力？
  - a. 从不=0
  - b. 有问题 ( $\leq 50\%$ ) =1
  - c. 严重问题 ( $\geq 50\%$ ) =2
4. 最近 3 个月，你是否感到排便后仍有排便不尽感？
  - a. 从不=0
  - b. 有问题 ( $\leq 50\%$ ) =1
  - c. 严重问题 ( $\geq 50\%$ ) =2
5. 最近 3 个月，你是否排便时感到大便在肛门处有梗阻/堵塞感？
  - a. 从不=0
  - b. 有问题 ( $\leq 50\%$ ) =1
  - c. 严重问题 ( $\geq 50\%$ ) =2
6. 最近 3 个月，排便时你是否需要手法辅助（如用手指或者借助开塞露等）？
  - a. 从不=0
  - b. 有问题 ( $\leq 50\%$ ) =1
  - c. 严重问题 ( $\geq 50\%$ ) =2
7. 你是否曾被诊断为“肠易激综合征”？
  - a. 是
  - b. 否
8. 不使用通便药物情况下，你是否会出现稀便？
  - a. 是
  - b. 否
9. 对于便秘情况（问题 1~8），你是否已经持续 6 个月及以上？
  - a. 是
  - b. 否

符合问题 9 和 1~6 中两条及两条以上，排除问题 7 和 8 即可诊断为便秘。  
便秘程度量化评估结果：总分

### Rome IV Constipation Diagnostic Questionnaire

1. In the last 3 months, without the use of laxatives or enemas, how many times per week did you have a bowel movement?
  - a.  $\geq 1$  time/day = 0
  - b.  $\geq 3$  times/week = 1
  - c.  $\leq 3$  times/week = 2
2. In the last 3 months, how often did you pass dry, hard or dry bulbous stools?
  - a. Never = 0
  - b. Problematic ( $\leq 50\%$ ) = 1
  - c. Serious problem ( $\geq 50\%$ ) = 2
3. In the last 3 months, did you feel strained to pass stools?
  - a. Never = 0
  - b. Problematic ( $\leq 50\%$ ) = 1
  - c. Serious problem ( $\geq 50\%$ ) = 2
4. In the last 3 months, did you feel a sense of incomplete bowel movement after defecation?
  - a. Never = 0
  - b. Problematic ( $\leq 50\%$ ) = 1
  - c. Serious problem ( $\geq 50\%$ ) = 2
5. In the last 3 months, did you feel a sense of obstruction/blockage of stool at the anus during defecation?
  - a. Never = 0
  - b. Problematic ( $\leq 50\%$ ) = 1
  - c. Serious problem ( $\geq 50\%$ ) = 2
6. In the last 3 months, did you need manual assistance (e.g., with fingers or with the help of a corkscrew, etc.) to have a bowel movement?
  - a. Never = 0
  - b. Problematic ( $\leq 50\%$ ) = 1
  - c. Serious problem ( $\geq 50\%$ ) = 2
7. Have you ever been diagnosed with "irritable bowel syndrome"?
  - a. Yes
  - b. No
8. Do you have loose stools without laxatives?
  - a. Yes
  - b. No
9. Has constipation (Q1-8) lasted for 6 months or more?
  - a. Yes
  - b. No

The diagnosis of constipation can be made if two or more of the questions 9 and 1 to 6 are met and questions 7 and 8 are excluded.

Quantitative assessment of the degree of constipation: Total score
